# Supplementary material for: Li+ incorporation and defect-creation processes imposed by X-ray and UV irradiation in Li-codoped Y3Al5O12:Ce scintillation crystals
Source: Royal Society of Chemistry journal article supplement (doi:10.1039/d2tc04520f), 2022-12-19
Supplement: d2tc04520f1.pdf [file d2tc04520f1.pdf]

## Supplementary materials

### Li<sup>+</sup> incorporation and defects creation processes imposed by X-ray and UV irradiation in Li codoped Y<sub>3</sub>Al<sub>5</sub>O<sub>12</sub>:Ce scintillation crystals

V. Laguta, M. Buryi, V. Babin, P. Machek, S. Zazubovich, K. Bartosiewicz, S. Kurosawa, A. Yamaji, A. Yoshikawa, K. Uličná, V. Chlan, H. Štěpánková, M. Nikl

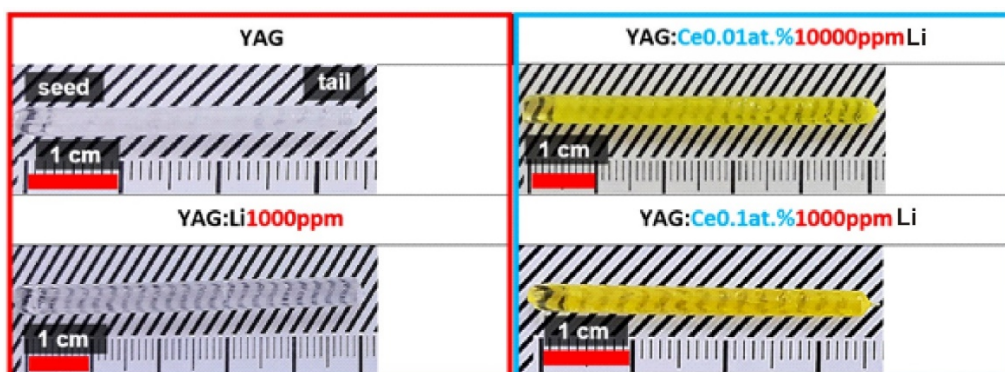

Fig. S1. Photographs of the as-grown undoped YAG, Li<sup>+</sup> doped YAG, and Li<sup>+</sup> codoped YAG:Ce crystals. The nominal concentrations of Ce<sup>3+</sup> (0, 0.01 and 0.1 at.%) and of Li<sup>+</sup> (0, 1000 and 10000 ppm) are shown.

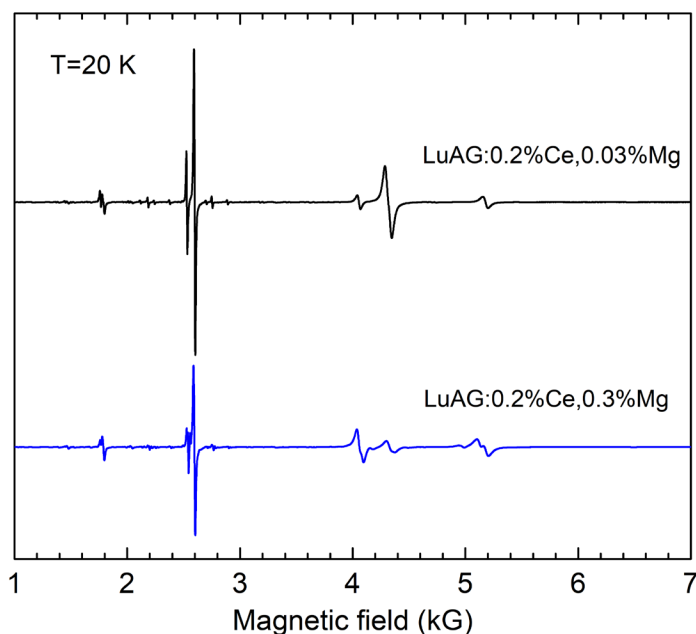

Fig. S2. Ce<sup>3+</sup> EPR spectra in Lu<sub>3</sub>Al<sub>5</sub>O<sub>12</sub>:0.2%Ce,0.03%Mg (LuAG:0.2%Ce,0.03%Mg) and Lu<sub>3</sub>Al<sub>5</sub>O<sub>12</sub>:0.2%Ce,0.3%Mg (LuAG:0.2%Ce,0.3%Mg) demonstrating marked decrease of Ce<sup>3+</sup> concentration on Mg codoping.

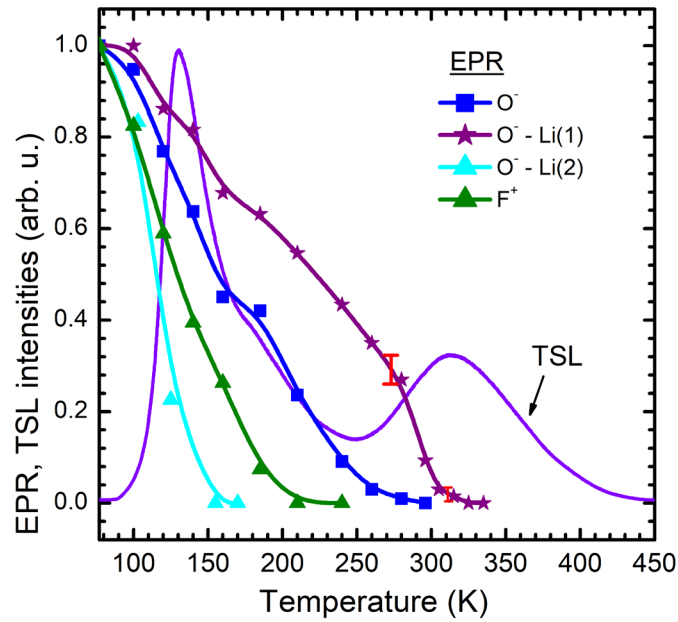

Fig. S3. Comparison of temperature dependences of the normalized EPR intensities of different centers with the TSL glow curve measured in YAG:0.1%Li sample.

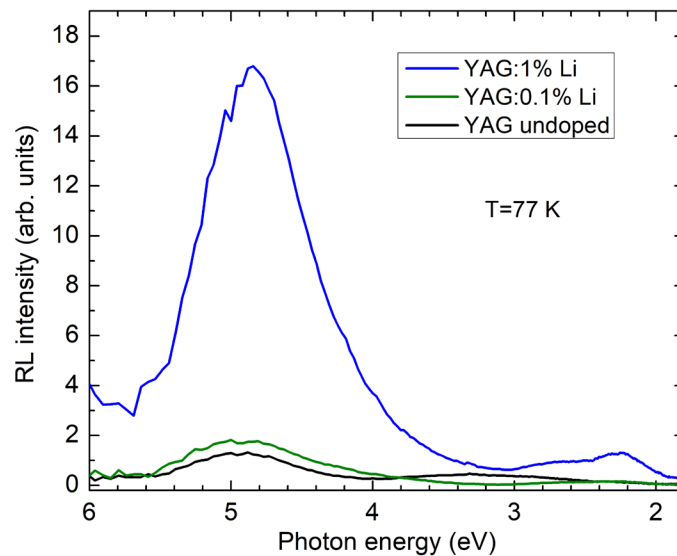

Fig. S4. X-ray excited luminescence spectra measured at 77 K in the undoped and Li-doped YAG crystals (YAG:0.1%Li; YAG:1.0%Li). The noticeable low-energy shift (on about 0.15 eV) of the X-ray-excited luminescence spectrum of YAG:1%Li (blue line) with respect to the spectra of YAG and YAG:0.1%Li (black and green lines, respectively) can be explained by the appearance in the former crystal of the luminescence of an exciton localized close to a  $\text{Li}^+$  ion. The maximum of this emission band is located at about 4.8 eV.

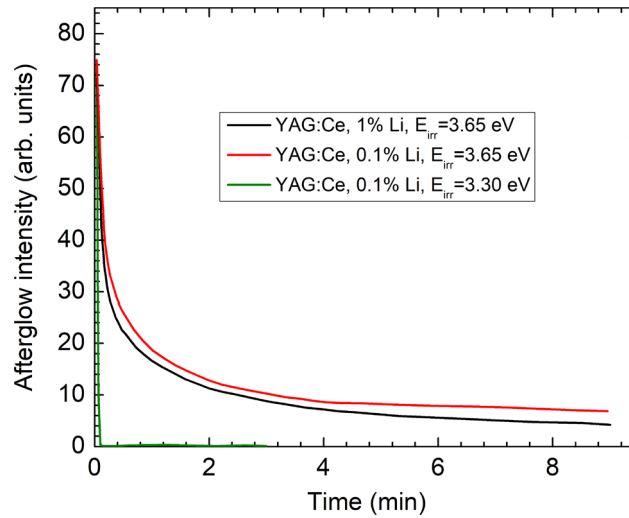

Fig. S5. Normalized afterglow decay curves measured at the same conditions at 85 K after irradiation of the YAG:0.1%Ce,1% Li (black line) and YAG:0.1% Ce,0.1% Li (red line) crystals with the same irradiation dose:  $E_{irr}=3.65$  eV. The afterglow decay curve measured after irradiation of the YAG:0.1% Ce,0.1%Li crystal with  $E_{irr} = 3.3$  eV (green line).

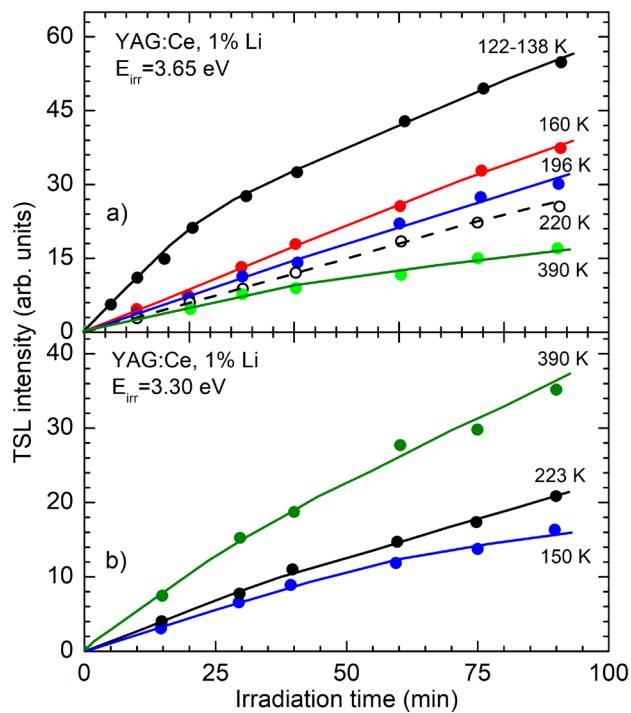

Fig. S6. Dependences of the TSL intensities on the irradiation duration  $t_{irr}$  (dose dependences) measured for the TSL glow curve peaks shown in the legends after irradiation of the YAG:0.1%,Ce,1.0% Li crystal at 85 K with (a)  $E_{irr} = 3.65$  eV and (b)  $E_{irr} = 3.3$  eV.
